# Supplementary material
Source: PubMed Central journal article supplement (PMC1829215)
Supplement: pnas_0700180104_2.pdf [file pnas_0700180104_2.pdf]

**Table 2. Summary of ANOVA results for percent cover data and density of lodgepole pine (*Pinus contorta*) seedlings in ten 0.25-ha plots that burned during summer 2000 by site (Glade vs. Moran fires), fire severity (crown vs. severe surface fire), and year (2001 to 2004)**

| Response                                     | Site | Year | Fire severity | Site × year | Site × fire severity | Year × fire severity | $r^2$ | $P$      |
|----------------------------------------------|------|------|---------------|-------------|----------------------|----------------------|-------|----------|
| Total biotic cover                           | NS   | ***  | NS            | NS          | NS                   | NS                   | 0.74  | < 0.0001 |
| Graminoids                                   | NS   | ***  | NS            | NS          | **                   | NS                   | 0.50  | 0.0042   |
| Forbs                                        | **   | **   | NS            | NS          | NS                   | NS                   | 0.60  | 0.0058   |
| <i>L. argenteus</i>                          | NS   | NS   | NS            | NS          | NS                   | NS                   | --    | NS       |
| <i>C. velutinus</i>                          | **   | NS   | *             | *           | *                    | NS                   | 0.68  | 0.0003   |
| Shrubs                                       | **   | NS   | NS            | NS          | NS                   | NS                   | 0.54  | 0.0222   |
| <i>P. contorta</i> seedlings                 | **   | NS   | *             | NS          | *                    | NS                   | 0.53  | 0.0205   |
| Charred litter                               | ***  | ***  | NS            | NS          | *                    | NS                   | 0.80  | < 0.0001 |
| Unburned litter                              | ***  | NS   | ***           | NS          | ***                  | **                   | 0.90  | < 0.0001 |
| Coarse wood                                  | NS   | NS   | NS            | NS          | NS                   | NS                   | --    | NS       |
| Rock                                         | NS   | **   | NS            | **          | NS                   | NS                   | 0.67  | 0.0005   |
| Mineral soil                                 | NS   | **   | **            | NS          | NS                   | NS                   | 0.62  | 0.0028   |
| Postfire <i>P. contorta</i> seedling density | **   | NS   | *             | NS          | *                    | NS                   | 0.48  | 0.05     |

For all models,  $n = 40$  and  $df = 12, 27$ . Entries indicate significant main effects and interaction terms: \*,  $P < 0.05$ ; \*\*,  $P < 0.01$ ; \*\*\*,  $P < 0.001$ . NS, not significant.
