# Supplementary material
Source: PubMed Central journal article supplement (PMC1829215)
Supplement: pnas_0700180104_3.pdf [file pnas_0700180104_3.pdf]

**Table 3. General soil characteristics for forest stands in which net N mineralization was studied between 2001 and 2004**

| <b>Fire</b>                        | <b>East Fire<br/>(n = 3)</b> | <b>Glade Fire<br/>(n = 5)</b> | <b>Moran Fire<br/>(n = 5)</b> | <b>Yellowstone<br/>Fires (n = 3)</b> | <b>West Thumb<br/>unburned<br/>(n = 3)</b> |
|------------------------------------|------------------------------|-------------------------------|-------------------------------|--------------------------------------|--------------------------------------------|
| <b>Year burned</b>                 | 2003                         | 2000                          | 2000                          | 1988                                 | --                                         |
| <b>Time since fire</b>             | 1 month                      | 2 yr                          | 2 yr                          | 15 yr                                | > 250 yr                                   |
| <b>pH</b>                          | 5.8 (0.4)                    | 5.6 (0.1)                     | 5.6 (0.3)                     | 5.5 (0.3)                            | 5.2 (0.2)                                  |
| <b>Soil organic<br/>matter (%)</b> | 4.1 (0.6)                    | 3.6 (0.5)                     | 4.4 (0.9)                     | 3.6 (0.7)                            | 5.9 (1.2)                                  |
| <b>P (ppm)</b>                     | 58 (10)                      | 7 (2)                         | 24 (8)                        | 8 (3)                                | 25 (5)                                     |
| <b>Exchangeable K<br/>(ppm)</b>    | 252 (36)                     | 213 (33)                      | 223 (35)                      | 204 (44)                             | 238 (32)                                   |
| <b>Exchangeable Ca<br/>(ppm)</b>   | 1231 (522)                   | 1126 (339)                    | 1130 (300)                    | 533 (194)                            | 1254 (244)                                 |
| <b>Exchangeable Mg<br/>(ppm)</b>   | 166 (107)                    | 69 (14)                       | 111 (6)                       | 86 (33)                              | 249 (70)                                   |
| <b>Total N (%)</b>                 | 0.12 (0.03)                  | 0.10 (0.02)                   | 0.11 (0.03)                   | 0.07 (0.01)                          | 0.14 (0.03)                                |
| <b>Soil C:N ratio*</b>             | 19.8                         | 20.9                          | 23.2                          | 29.8                                 | 24.4                                       |

General soil characteristics were not available for the five stands for which net N mineralization was measured from 1997-1998 (see *Methods*). Values are mean among stands (standard deviation).

\*Calculated using a factor of 0.58 to convert percent soil organic matter to percent carbon.
